# Supplementary material
Source: PubMed Central journal article supplement (PMC9151935)

Additional file 1

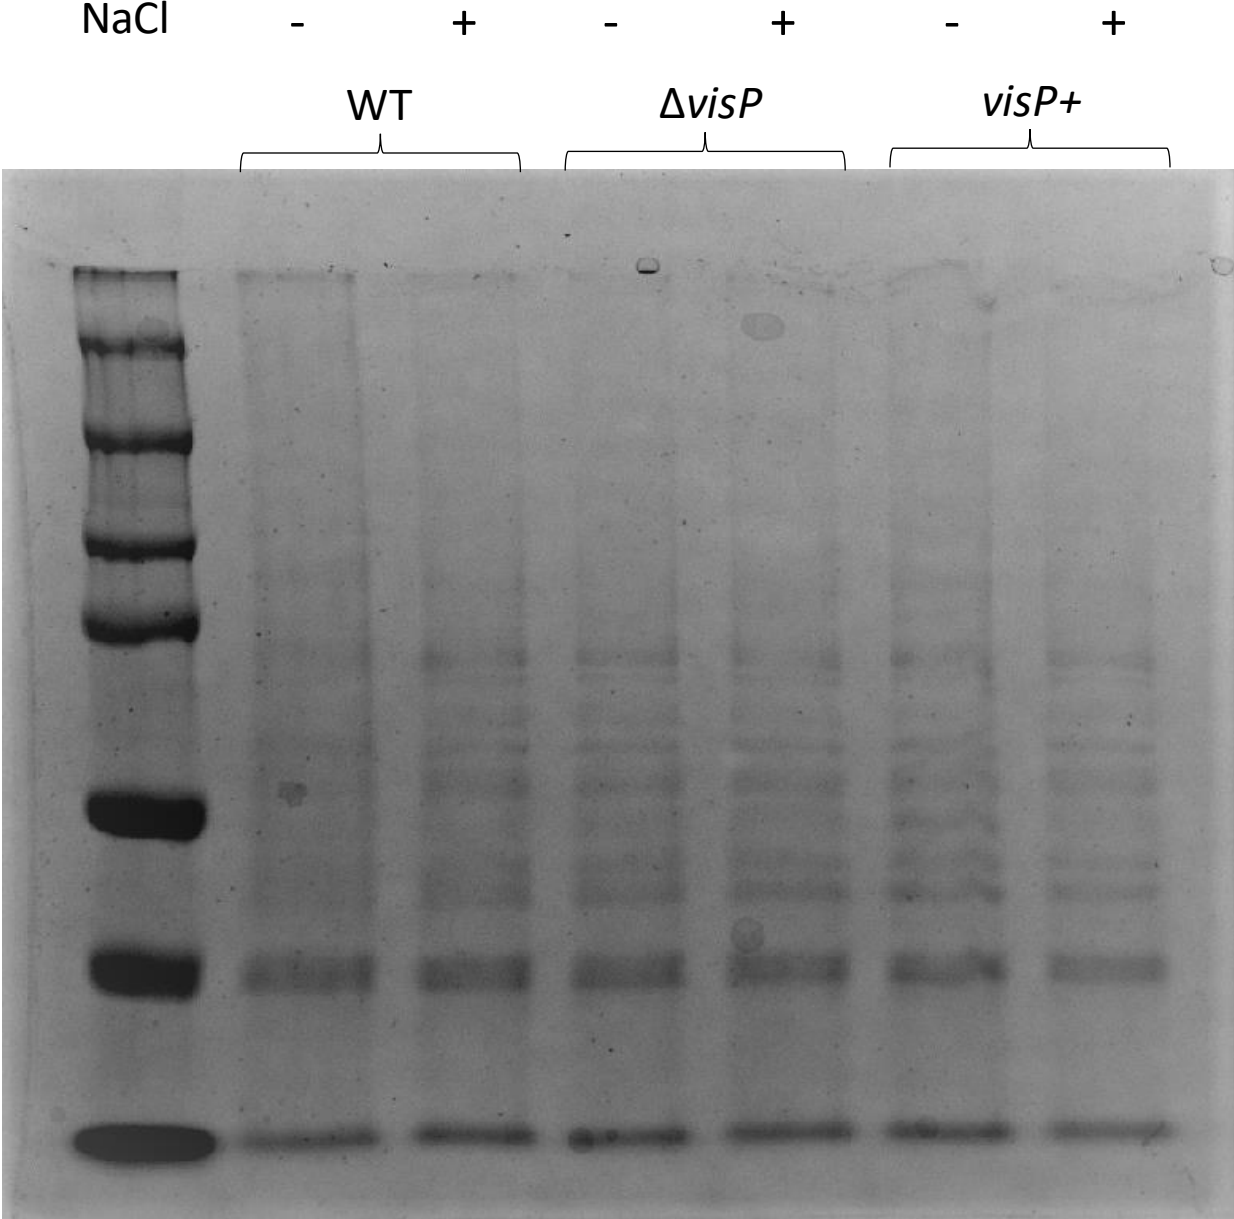

Supplement: 42770_2022_701_MOESM1_ESM.pdf [file 42770_2022_701_MOESM1_ESM.pdf]

Additional file 2

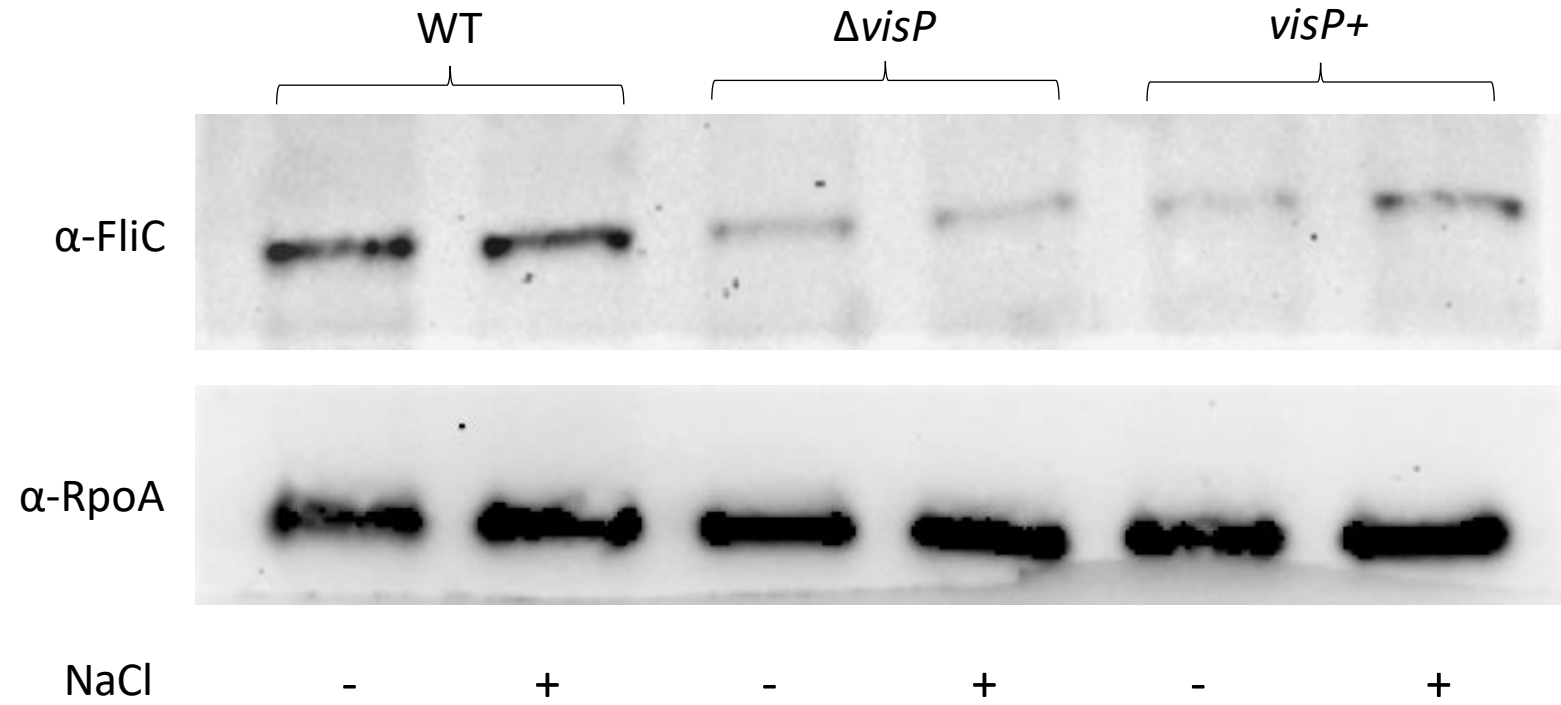

Supplement: 42770_2022_701_MOESM2_ESM.pdf [file 42770_2022_701_MOESM2_ESM.pdf]

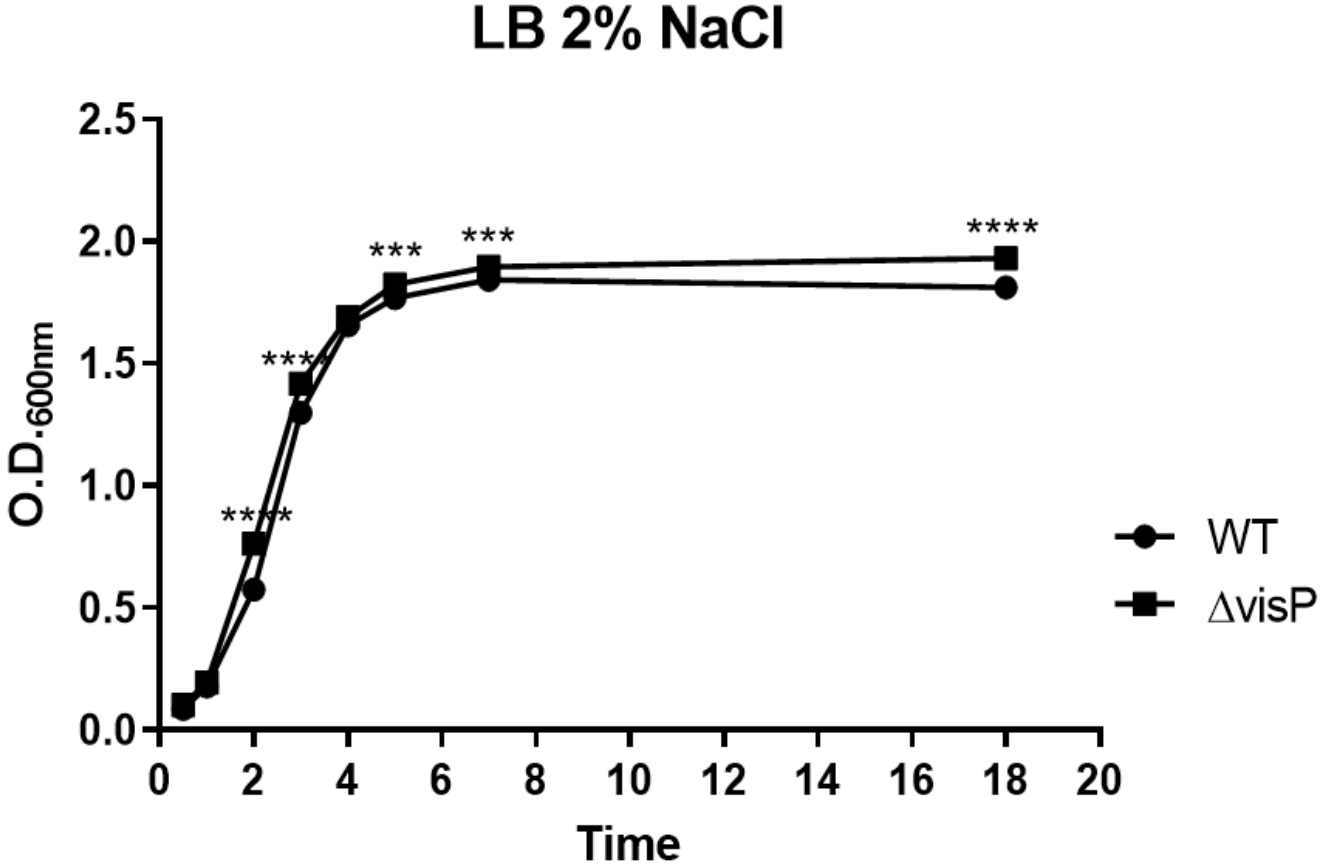

Supplement: 42770_2022_701_MOESM3_ESM.pdf [file 42770_2022_701_MOESM3_ESM.pdf]
